# Supplementary material for: Soluble Gamma-secretase Modulators Attenuate Alzheimer's β-amyloid Pathology and Induce Conformational Changes in Presenilin 1
Source: PubMed Central journal article supplement — eBioMedicine. 2017 Sep 4;24:93–101. doi: 10.1016/j.ebiom.2017.08.028 (PMC5652037; doi:10.1016/j.ebiom.2017.08.028), 2017-09-04
Supplement: mmc1.pdf [file mmc1.pdf]

## Supplementary Figures

| Levels (pg/mL) | Brain Soluble |              | Brain Insoluble |              | Plasma       |              |
|----------------|---------------|--------------|-----------------|--------------|--------------|--------------|
|                | A $\beta$ 40  | A $\beta$ 42 | A $\beta$ 40    | A $\beta$ 42 | A $\beta$ 40 | A $\beta$ 42 |
| Ctrl           | 157.8997      | 17.78129     | 15081.02        | 1697.772     | 3521.765     | 91.23203     |
| SGSM-36        | 177.5903      | 12.36256     | 11023.97        | 984.5278     | 3025.597     | 49.04376     |

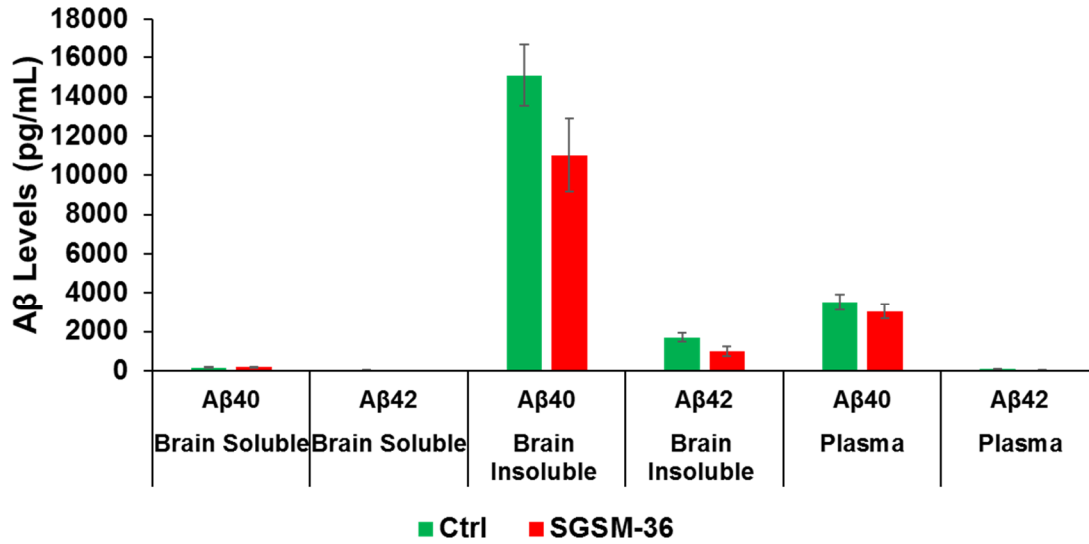

**Supplementary Figure 1.** Brain soluble, brain insoluble and plasma A $\beta$  levels (pg/mL) in Tg2576 mice treated with control or SGSM-36.

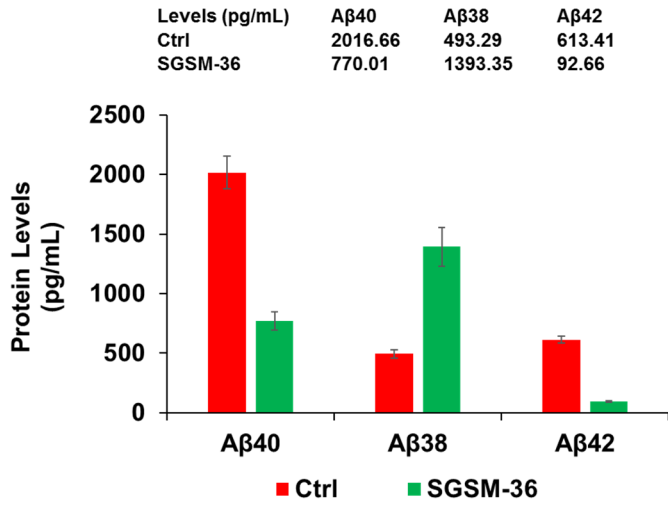

**Supplementary Figure 2.** A $\beta$  levels (pg/mL) from medium of 3D-differentiated FAD HReN cells treated with control or SGSM-36.
